# Supplementary material
Source: PubMed Central journal article supplement (PMC3146599)

**Supplementary Table 1**

| <b>Antibody<br/>(Subcellular)</b> | <b>Clone</b> | <b>Company</b>     | <b>Overnight<br/>Dilution</b> | <b>Antigen<br/>retrieval</b> | <b>Detection<br/>System</b> |
|-----------------------------------|--------------|--------------------|-------------------------------|------------------------------|-----------------------------|
| <b>FASN</b>                       | 6E7          | Fas Gen            | 1:100                         | pH-9                         | Envision+                   |
| <b>p-AKT</b>                      | Ser473       | Cell<br>Signalling | Predilute                     | pH-9                         | Signal Stain<br>IHC         |
| <b>Ki-67</b>                      | MIB-1        | Dako               | 1:100                         | pH-9                         | Envision+                   |

# Supplementary Figure-1

## A

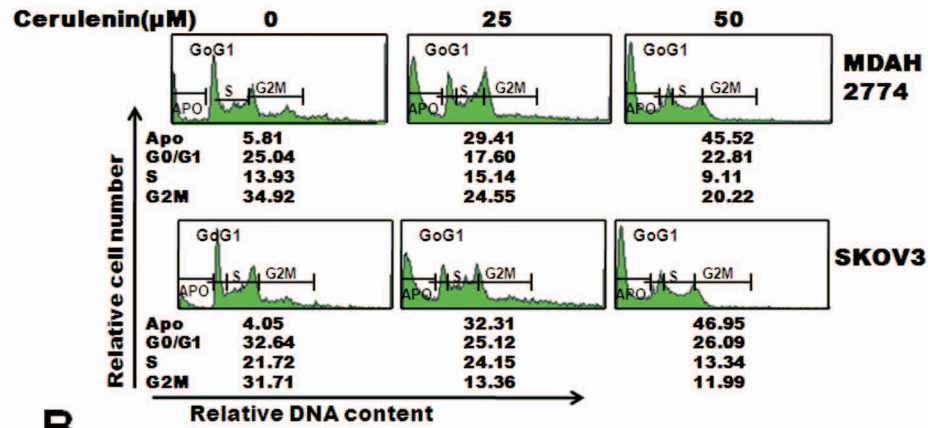

## B

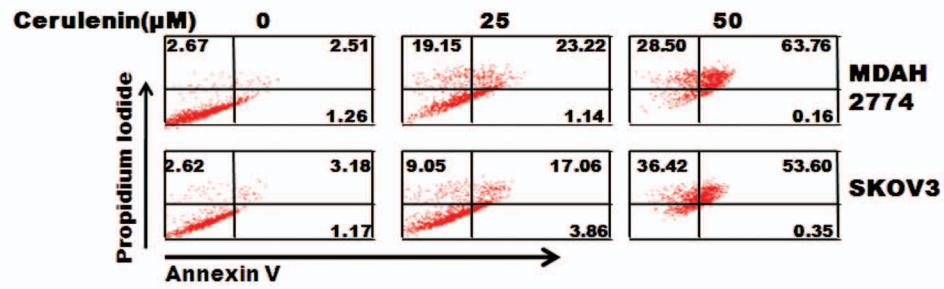

Supplement: 11_46_Uddin_Suppl.pdf [file 11_46_Uddin_Suppl.pdf]
